# Supplementary material
Source: PubMed Central journal article supplement (PMC554819)

A

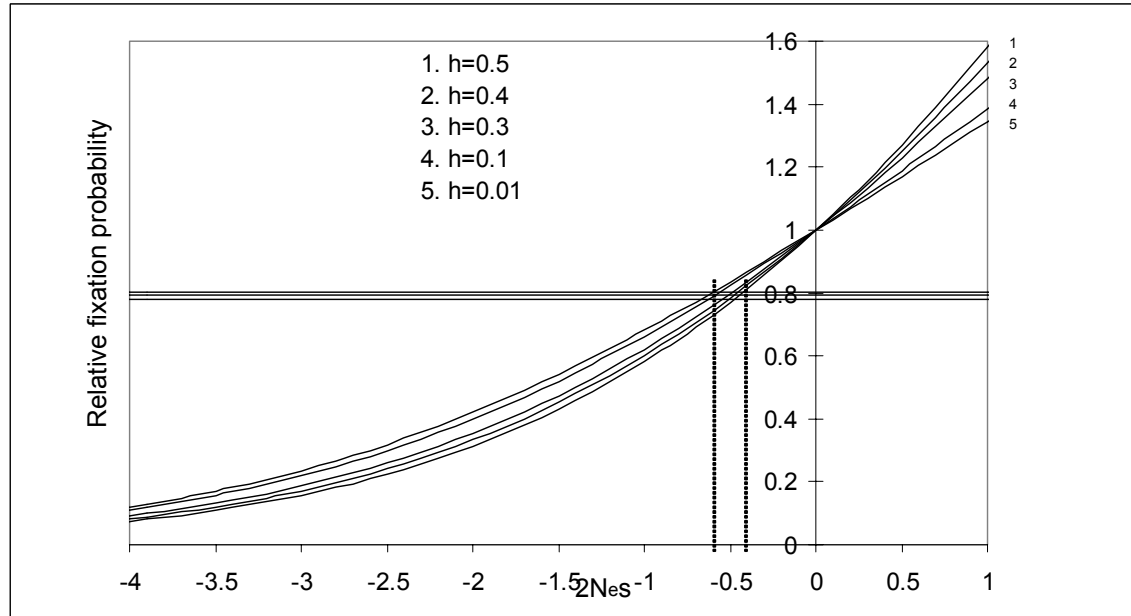

**B**

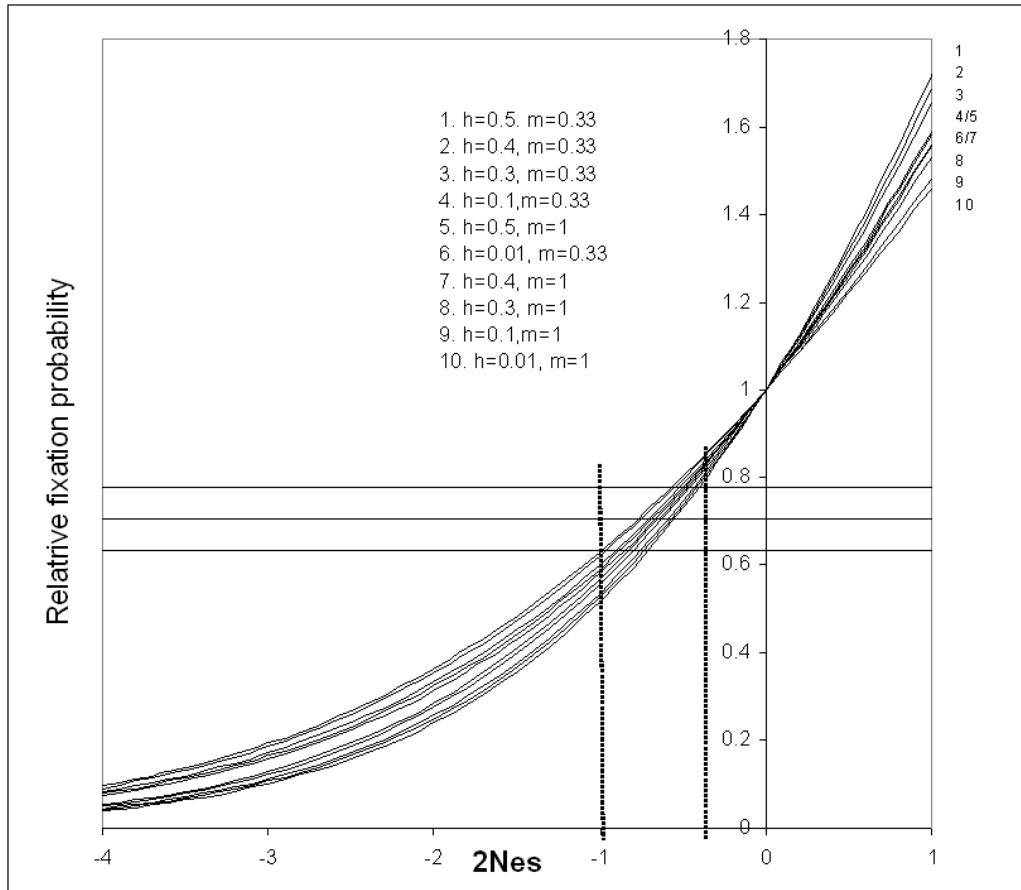

Supplement: pnas_102_11_4063__1.pdf [file pnas_102_11_4063__1.pdf]
